# Supplementary material
Source: publisher figshare collection journal article supplement (https://wiley.figshare.com/articles/dataset/_/3519461)
Supplement: Supplementary file 1 [file 1 › appendix-A.htm]

Ecological Archives A024-056-A1


*Ecological Archives* A024-056-A1

Steven L. Voelker, J. Renée Brooks, Frederick C. Meinzer, John Roden, Anna Pazdur, Slawomira Pawelczyk, Peter Hartsough, Keirith Snyder, Lenka Plavcová, Jiří Šantrůček. 2014. Reconstructing relative humidity from plant δ18O and δD as deuterium deviations from the global meteoric water line. *Ecological Applications* 24:960–975. http://dx.doi.org/10.1890/13-0988.1

Appendix A. The mechanistic framework for using cellulose δ18O and δD to predict leaf water δ18O and δD and thereby calculate deuterium deviations from the global meteoric water line (Δ*d*).

> View / download PDF.


---

[Back to A024-056]
